# Supplementary material for: Deciphering the RRM-RNA recognition code: A computational analysis
Source: PubMed Central journal article supplement (PMC9894542; doi:10.1371/journal.pcbi.1010859), 2023-01-23
Supplement: pcbi.1010859.s002.pdf [file pcbi.1010859.s002.pdf]

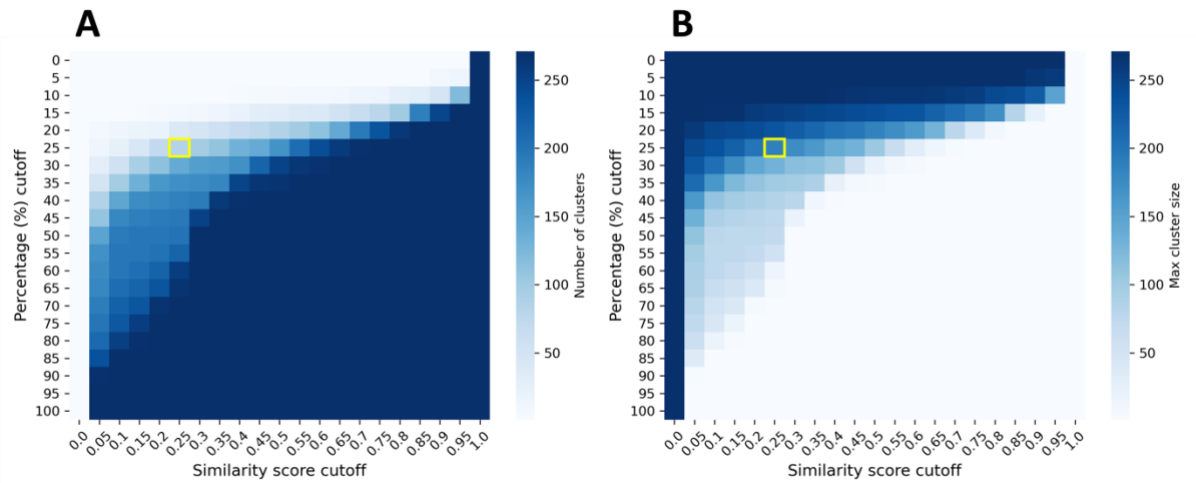

S2 Fig: Variation on the number of clusters (A) and number of entries in the biggest cluster (B) depending on the chosen cutoffs for similarity score (X-axis, scores from 0 to 1) and percentage of entries (Y-axis from 0% to 100%) that should have an equal or higher similarity score with the rest of the cluster. The chosen cutoff for the cluster generation is highlighted in yellow.
