# Supplementary material for: Deciphering the RRM-RNA recognition code: A computational analysis
Source: PubMed Central journal article supplement (PMC9894542; doi:10.1371/journal.pcbi.1010859), 2023-01-23
Supplement: pcbi.1010859.s003.pdf [file pcbi.1010859.s003.pdf]

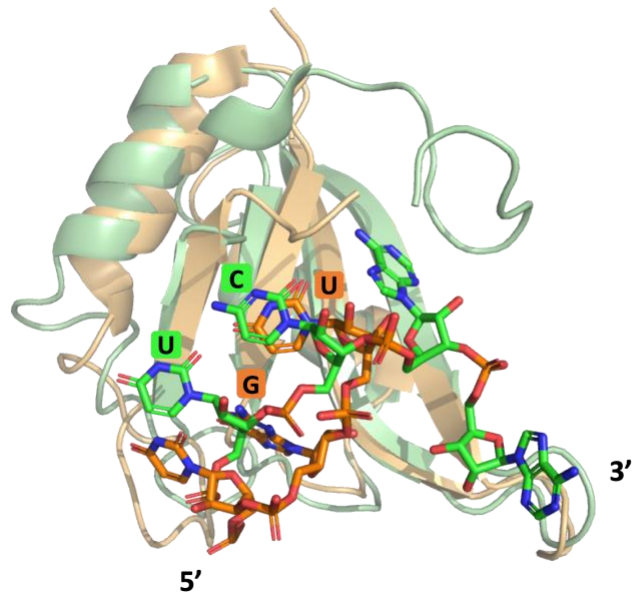

S3 Fig: Superimposed RRM-RNA complexes with the lowest similarity score in cluster 0, PDB Id. 6g90 (chain B, green) and PDB Id. 3nh (chain B, orange). The aligned nucleotides used for the RMSD calculations are labelled.
