# Supplementary material for: Deciphering the RRM-RNA recognition code: A computational analysis
Source: PubMed Central journal article supplement (PMC9894542; doi:10.1371/journal.pcbi.1010859), 2023-01-23
Supplement: pcbi.1010859.s004.pdf [file pcbi.1010859.s004.pdf]

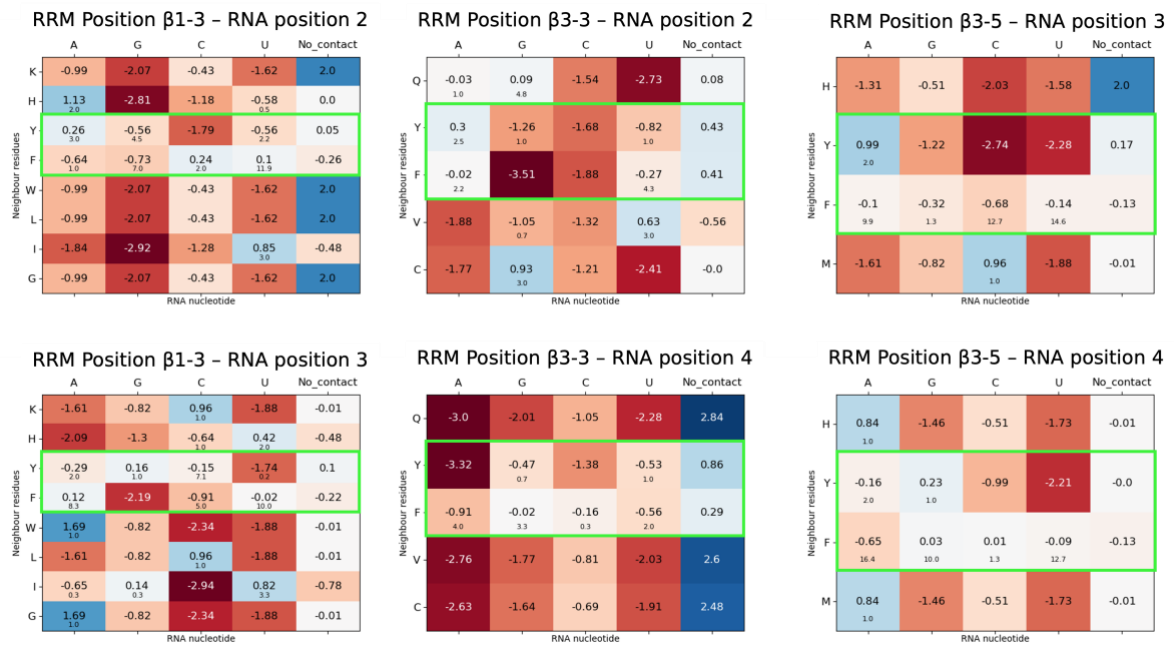

S4 Fig: Scores for the conserved aromatic positions in RNP1 ( $\beta$ 1-3) and RNP2 ( $\beta$ 3-3,  $\beta$ 3-5) in contact with their respective RNA positions (phenylalanine and tyrosine scores are highlighted in bright green).
