# Supplementary material for: Deciphering the RRM-RNA recognition code: A computational analysis
Source: PubMed Central journal article supplement (PMC9894542; doi:10.1371/journal.pcbi.1010859), 2023-01-23
Supplement: pcbi.1010859.s005.pdf [file pcbi.1010859.s005.pdf]

S1 Table: PFAM identifiers and related metadata of the selected RRM families for the analysis.

| <b>PFAM ID</b> | <b>PFAM NAME</b> | <b>PFAM TYPE</b> | <b>PFAM CLAN ID</b> | <b>PFAM CLAN NAME</b> |
|----------------|------------------|------------------|---------------------|-----------------------|
| <b>PF00076</b> | RRM_1            | Family           | CL0221              | RRM                   |
| <b>PF02994</b> | Transposase_22   | Family           | CL0221              | RRM                   |
| <b>PF03467</b> | Smg4_UPF3        | Family           | CL0221              | RRM                   |
| <b>PF03468</b> | XS               | Family           | CL0221              | RRM                   |
| <b>PF03880</b> | DbpA             | Family           | CL0221              | RRM                   |
| <b>PF04847</b> | Calcipressin     | Family           | CL0221              | RRM                   |
| <b>PF05172</b> | Nup35_RRM        | Family           | CL0221              | RRM                   |
| <b>PF08152</b> | GUCT             | Family           | CL0221              | RRM                   |
| <b>PF08675</b> | RNA_bind         | Family           | CL0221              | RRM                   |
| <b>PF08777</b> | RRM_3            | Family           | CL0221              | RRM                   |
| <b>PF08952</b> | DUF1866          | Family           | CL0221              | RRM                   |
| <b>PF09162</b> | Tap-RNA_bind     | Family           | CL0221              | RRM                   |
| <b>PF11608</b> | Limkain-b1       | Family           | CL0221              | RRM                   |
| <b>PF11835</b> | RRM_8            | Family           | CL0221              | RRM                   |
| <b>PF13893</b> | RRM_5            | Family           | CL0221              | RRM                   |
| <b>PF16367</b> | RRM_7            | Family           | CL0221              | RRM                   |
| <b>PF16842</b> | RRM_occluded     | Family           | CL0221              | RRM                   |
| <b>PF17774</b> | YlmH_RBD         | Family           | CL0221              | RRM                   |
| <b>PF18444</b> | RRM_9            | Family           | CL0221              | RRM                   |
