# Supplementary material for: Deciphering the RRM-RNA recognition code: A computational analysis
Source: PubMed Central journal article supplement (PMC9894542; doi:10.1371/journal.pcbi.1010859), 2023-01-23
Supplement: pcbi.1010859.s006.pdf [file pcbi.1010859.s006.pdf]

S2 Table: Identifiers of the 19 selected structures to use in PROMALS3D.

| <b>UniProt Id.</b> | <b>PDB Id.</b> | <b>Chain</b> | <b>PFAM family</b> |
|--------------------|----------------|--------------|--------------------|
| <b>P09012</b>      | 1FHT           | A            | RRM_1              |
| <b>O18409</b>      | 2KHC           | A            | RRM_1              |
| <b>F1LQ48</b>      | 2MQL           | A            | RRM_1              |
| <b>Q9NIH4</b>      | 5ZUH           | A            | RRM_1              |
| <b>P22626</b>      | 1X4B           | A            | RRM_1              |
| <b>P05455</b>      | 1OWX           | A            | RRM_3              |
| <b>Q4G0J3</b>      | 5KNW           | A            | RRM_3              |
| <b>P26599</b>      | 2N3O           | A            | RRM_5              |
| <b>Q8NE35</b>      | 2DNL           | A            | RRM_7              |
| <b>Q921F4</b>      | 2E5I           | A            | RRM_8              |
| <b>G0SET4</b>      | 4WPM           | A            | RRM_9              |
| <b>Q99257</b>      | 4WWU           | A            | RRM_9              |
| <b>O15056</b>      | 1UFW           | A            | DUF1866            |
| <b>Q9JHG6</b>      | 1WEY           | A            | CALCIPRESSIN       |
| <b>Q8R4R6</b>      | 1WWH           | A            | NUP35_RRM          |
| <b>Q9Y4F3</b>      | 2DIU           | A            | MARF_RRM1          |
| <b>P42305</b>      | 2G0C           | A            | DPA                |
| <b>Q9H1J1</b>      | 2L08           | A            | SMG4_UPF3          |
| <b>Q9NR30</b>      | 2M3D           | A            | GUCT               |
