# Supplementary material for: Deciphering the RRM-RNA recognition code: A computational analysis
Source: PubMed Central journal article supplement (PMC9894542; doi:10.1371/journal.pcbi.1010859), 2023-01-23
Supplement: pcbi.1010859.s007.pdf [file pcbi.1010859.s007.pdf]

S3 Table: Experimental Kd values correlated with the RRMScorer scores for the WT RNA and the 36 RNA mutants tested against MSI1 RRM1, using a window size of three nucleotides.

| <b>RNA SEQUENCE</b> | <b>SCORE</b> | <b>KD</b> |
|---------------------|--------------|-----------|
| UUUAUAGUUUUU        | -0.300       | 68        |
| AUUAUAGUUUUU        | -0.300       | 128       |
| CUUAUAGUUUUU        | -0.300       | 144       |
| GUUAUAGUUUUU        | -0.300       | 109.3     |
| UAUAUAGUUUUU        | -0.300       | 142.7     |
| UCUAUAGUUUUU        | -0.300       | 113.7     |
| UGUAUAGUUUUU        | -0.300       | 96.6      |
| UUAUAGUUUUU         | -0.300       | 128.7     |
| UUCAUAGUUUUU        | -0.300       | 95.3      |
| UUGAUAGUUUUU        | -0.300       | 70.9      |
| UUUCUAGUUUUU        | -0.300       | 92.1      |
| UUUGUAGUUUUU        | -0.300       | 40.3      |
| UUUUUAGUUUUU        | -0.300       | 66.4      |
| UUUAAAGUUUUU        | -0.518       | 1953.3    |
| UUUACAGUUUUU        | -0.486       | 1106.7    |
| UUUAGAGUUUUU        | -0.300       | 180.3     |
| UUUAUCGUUUUUU       | -0.591       | 2070      |
| UUUAUGGUUUUUU       | -0.481       | 1533.3    |
| UUUAUUGUUUUU        | -0.437       | 1750      |
| UUUAUAAUUUUU        | -0.518       | 2500      |
| UUUAUACUUUUU        | -0.514       | 2460      |
| UUUAUAUUUUUU        | -0.591       | 2223.3    |
| UUUAUAGAUUUU        | -0.300       | 178.7     |
| UUUAUAGCUUUU        | -0.300       | 235.7     |
| UUUAUAGGUUUU        | -0.300       | 84        |
| UUUAUAGUAUUU        | -0.300       | 149.3     |
| UUUAUAGUCUUU        | -0.300       | 133.3     |
| UUUAUAGUGUUU        | -0.300       | 110       |
| UUUAUAGUUAAU        | -0.300       | 144.3     |
| UUUAUAGUUCUU        | -0.300       | 131       |
| UUUAUAGUUGUU        | -0.300       | 102.9     |
| UUUAUAGUUUAU        | -0.300       | 162       |
| UUUAUAGUUUCU        | -0.300       | 137.7     |
| UUUAUAGUUUGU        | -0.300       | 91.4      |
| UUUAUAGUUUUA        | -0.300       | 144       |
| UUUAUAGUUUUC        | -0.300       | 89.6      |
| UUUAUAGUUUUG        | -0.300       | 99.7      |
