# Supplementary material for: Deciphering the RRM-RNA recognition code: A computational analysis
Source: PubMed Central journal article supplement (PMC9894542; doi:10.1371/journal.pcbi.1010859), 2023-01-23
Supplement: pcbi.1010859.s008.pdf [file pcbi.1010859.s008.pdf]

$$I(\Delta N_i; R_j) = I(N_i; R_j) - I(n - N_i; R_j) \quad \text{Equation S1}$$

$$I(N_i; R_j) = \log \left( \frac{f_{N_i, R_j} / f_{R_j}}{f_{N_i} / R} \right) \quad \text{Equation S2}$$

$$I(n - N_i; R_j) = \log \left( \frac{f_{n - N_i, R_j} / f_{R_j}}{f_{n - N_i} / R} \right) \quad \text{Equation S3}$$

$$I(\Delta N_i; R_j) = \log \left( \frac{f_{N_i, R_j}}{f_{n - N_i, R_j}} \right) + \log \left( \frac{f_{n - N_i}}{f_{N_i}} \right) \quad \text{Equation S4}$$

S1-S4 Equations: Basis for the development of the RRMScorer equation. Our method is based on the information difference between the occurrence of two events, in our case the information of how often a specific nucleotide interacts with a specific residue,  $I(N_i; R_j)$ , and the information when that same nucleotide interacts with any other residue,  $I(n - N_i; R_j)$  (equation S1). The individual terms are developed in equations S2 and S3 where:  $f_{N_i, R_j}$  is the number of occurrences for a specific contact between nucleotide  $i$  and residue  $j$ ;  $f_{R_j}$  the number of times residue  $j$  is in that position;  $f_{N_i}$  the number of times nucleotide  $i$  is in that position;  $f_{n - N_i, R_j}$  the number of times nucleotide  $i$  interacts with any residue but residue  $j$ ;  $f_{n - N_i}$  the number nucleotides other than nucleotide  $i$  in that position;  $R$  the total number of residues in the dataset. As it's a difference between the two logarithms, the common terms that account for the number of specific residues in position  $j$  ( $f_{R_j}$ ) and total number of residues in the dataset ( $R$ ) disappear from the equation. After the simplification we obtain equation S4 (Same as equation 2 in the main text).
